# Supplementary material for: Meta-ethnography of experiences of early discharge, with a focus on paediatric febrile neutropenia
Source: Springer Nature journal article supplement (doi:10.1007/s00520-017-3983-2), 2017-12-28
Supplement: MOESM1 [file 15333886]

## Supplemental File 1: Database search strategy

Meta-ethnography of experiences of early discharge, with a focus on paediatric febrile neutropenia

Supportive Care in Cancer

Jessica E Morgan\*, Jemma Cleminson, Lesley A Stewart, Robert S Phillips, and Karl Atkin

\*Corresponding Author: Jessica E Morgan, Centre for Reviews and Dissemination, University of York, Heslington, York, YO10 5DD, UK, Email: jess.morgan@york.ac.uk,

### British Nursing Index (BNI) (ProQuest – <http://search.proquest.com/>)

1994 to current

Searched on 18/07/2014

Retrieved 315 hits (after automatic de-duplication by BNI)

### Search Strategy (Febrile neutropenia OR early discharge):=

Key:

ti(*terms*) = searches terms in title field

ab(*terms*) = searches terms in abstract field

NEAR/1 = terms within one word of each other (any order)

NEAR/2 = terms within two words of each other (any order)

\* = truncation – unlimited characters

?? = two wild characters

SU.EXACT = single indexing term

SU.EXACT.EXPLODE = exploded indexing term

(ti(early NEAR/2 discharge\*) OR ab(early NEAR/2 discharge\*) OR (SU.EXACT("Patients : Discharge") AND SU.EXACT("Patients : Admission"))) OR ((ti(febrile NEAR/5 (neutropen\* OR granulocyt\* OR agranulocyt\* OR leukocyt\*??ni\* OR leukocyt\*ni\*)) OR ab(febrile NEAR/5 (neutropen\* OR granulocyt\* OR agranulocyt\* OR leukocyt\*??ni\* OR leukocyt\*ni\*)) OR (ti((fever OR temperature OR temp) NEAR/5 (neutropen\* OR granulocyt\* OR agranulocyt\* OR leukocyt\*??ni\*)) OR ab((fever OR temperature OR temp) NEAR/5 (neutropen\* OR granulocyt\* OR agranulocyt\* OR leukocyt\*??ni\*)) OR (SU.EXACT("Fever") AND SU.EXACT.EXPLODE("Blood and Blood Disorders"))))

### CINAHL - Cumulative Index to Nursing & Allied Health Literature (EBSCO – <http://www.ebscohost.com/>)

1981 - current

Searched on 12/06/2014

Retrieved 517 hits

### CINAHL (EBSCO)

Key

MH = indexing term (CINAHL heading)

+ =exploded CINAHL heading

\* = truncation

? = embedded truncation

“ ” = phrase search

ZT = publication type

n1 = terms within one word of each other (any order)

n2 = terms within two words of each other (any order)

**Search Strategy – ((febrile neutropenia AND early discharge) OR (children AND early discharge)):**

S25 S23 OR S24 Search modes - Boolean/Phrase Interface - EBSCOhost Research Databases  
Search Screen - Advanced Search  
517 hits

S24 S3 AND S22 Search modes - Boolean/Phrase Interface - EBSCOhost Research Databases  
Search Screen - Advanced Search  
508 hits

S23 S3 AND S17 Search modes - Boolean/Phrase Interface - EBSCOhost Research Databases  
Search Screen - Advanced Search  
21 hits

S22 S18 OR S19 OR S20 OR S21 Search modes - Boolean/Phrase Interface - EBSCOhost  
Research Databases  
Search Screen - Advanced Search  
745,047 hits

S21 TI ( newborn\* or new-born\* or baby\* or babies or neonat\* or infan\* or kid or kids or toddler\* or adoles\* or teen\* or boy\* or girl\* or junevil\* or youth\* or puber\* or prepuber\* or pubescen\* or prepubescen\* or pediatric\* or paediatric\* or “young person\*” or “young people” or “young adult\*” or child\* or schoolchild\* or schoolage\* or school\* or preschool\* ) OR AB ( newborn\* or new-born\* or baby\* or babies or neonat\* or infan\* or kid or kids or toddler\* or adoles\* or teen\* or boy\* or girl\* or junevil\* or youth\* or puber\* or prepuber\* or pubescen\* or prepubescen\* or pediatric\* or paediatric\* or “young person\*” or “young people” or “young adult\*” or child\* or schoolchild\* or schoolage\* or school\* or preschool\* ) Search modes - Boolean/Phrase Interface - EBSCOhost Research Databases  
Search Screen - Advanced Search  
453,137 hits

S20 (MH "Young Adult") Search modes - Boolean/Phrase Interface - EBSCOhost Research  
Databases  
Search Screen - Advanced Search  
89,795 hits

S19 (MH "Adolescence+") Search modes - Boolean/Phrase Interface - EBSCOhost Research  
Databases  
Search Screen - Advanced Search  
302,618 hits

S18 (MH "Child+") Search modes - Boolean/Phrase Interface - EBSCOhost Research Databases  
Search Screen - Advanced Search  
404,639 hits

S17 S11 OR S16 Search modes - Boolean/Phrase Interface - EBSCOhost Research Databases  
Search Screen - Advanced Search  
1,187 hits

S16 S12 OR S13 OR S14 Search modes - Boolean/Phrase Interface - EBSCOhost Research  
Databases  
Search Screen - Advanced Search  
1,041 hits

S15 TI ( temp N5 (neutropen\* or granulocyt\* or agranulocyt\* or leukocytopeni\*) ) OR AB ( temp N5 (neutropen\* or granulocyt\* or agranulocyt\* or leukocytopeni\*) ) Search modes - Boolean/PhraseInterface - EBSCOhost Research Databases  
Search Screen - Advanced Search  
0 hits

S14 TI ( temperature N5 (neutropen\* or granulocyt\* or agranulocyt\* or leukocytopeni\*) ) OR AB ( temperature N5 (neutropen\* or granulocyt\* or agranulocyt\* or leukocytopeni\*) ) Search modes - Boolean/Phrase Interface - EBSCOhost Research Databases  
Search Screen - Advanced Search  
2 hits

S13 TI ( fever N5 (neutropen\* or granulocyt\* or agranulocyt\* or leukocytopeni\*) ) OR AB ( fever N5 (neutropen\* or granulocyt\* or agranulocyt\* or leukocytopeni\*) ) Search modes - Boolean/PhraseInterface - EBSCOhost Research Databases  
Search Screen - Advanced Search  
288 hits

S12 TI ( febrile N5 (neutropen\* or granulocyt\* or agranulocyt\* or leukocytopeni\*) ) OR AB ( febrile N5 (neutropen\* or granulocyt\* or agranulocyt\* or leukocytopeni\*) ) Search modes - Boolean/PhraseInterface - EBSCOhost Research Databases  
Search Screen - Advanced Search  
824 hits

S11 S7 AND S10 Search modes - Boolean/Phrase Interface - EBSCOhost Research Databases  
Search Screen - Advanced Search  
480 hits

S10 S8 OR S9 Search modes - Boolean/Phrase Interface - EBSCOhost Research Databases  
Search Screen - Advanced Search  
12,808 hits

S9 (MH "Body Temperature+") Search modes - Boolean/Phrase Interface - EBSCOhost Research Databases  
Search Screen - Advanced Search  
6,820 hits

S8 (MH "Fever+") Search modes - Boolean/Phrase Interface - EBSCOhost Research Databases  
Search Screen - Advanced Search  
6,543 hits

S7 S4 OR S5 OR S6 Search modes - Boolean/Phrase Interface - EBSCOhost Research Databases  
Search Screen - Advanced Search  
2,901 hits

S6 (MH "Agranulocytosis") Search modes - Boolean/Phrase Interface - EBSCOhost Research Databases  
Search Screen - Advanced Search  
229 hits

S5 (MH "Neutropenia") Search modes - Boolean/Phrase Interface - EBSCOhost Research Databases  
Search Screen - Advanced Search  
2,448 hits

S4 (MH "Leukopenia") Search modes - Boolean/Phrase Interface - EBSCOhost Research Databases  
Search Screen - Advanced Search  
319 hits

S3 S1 OR S2 Search modes - Boolean/Phrase Interface - EBSCOhost Research Databases  
Search Screen - Advanced Search  
1,472 hits

S2 TI early n2 discharge\* OR AB early n2 discharge\* Search modes - Boolean/Phrase Interface - EBSCOhost Research Databases  
Search Screen - Advanced Search  
1,064 hits

S1 (MH "Early Patient Discharge") Search modes - Boolean/Phrase Interface - EBSCOhost Research Databases  
Search Screen - Advanced Search  
730 hits

**EMBASE:**

**Febrile neutropenia and length of stay**

**EMBASE** <1974 to 2014 May 20> was searched on 21/05/2015, using the OVID SP interface.  
1326 records were retrieved

**Early discharge and children**

**EMBASE** <1974 to 2014 July 22> was searched on 23/07/2015, using the OVID SP interface.  
778 records were retrieved

**Key:**

/ = indexing term (EMTREE heading)

\* = focussed EMTREE heading

exp = exploded EMTREE heading

\* = truncation

? = embedded truncation

.ti,ab. = terms in either title or abstract fields

.tw.= textword

adj = terms adjacent to each other (same order)

adj1 = terms within one word of each other (any order)

adj2 = terms within two words of each other (any order)

**Strategy - Febrile neutropenia and length of stay:**

- 1 \*Agranulocytosis/ or \*neutropenia/ or \*leukopenia/ (19460)
- 2 \*Fever/ or \*pyrexia idiopathica/ or exp \*Body Temperature/ (37027)
- 3 (1 and 2) or \*febrile neutropenia/ (3365)
- 4 (febrile adj5 (neutropen\* or granulocytop\* or agranulocyto\* or leukocytop??ni\*)).ti,ab. (8603)
- 5 ((fever or temperature or temp) adj5 (neutropen\* or granulocytop\* or agranulocyto\* or leukocytop??ni\*)).ti,ab. (3879)
- 6 3 or 4 or 5 (12590)
- 7 \*"length of stay"/ or \*hospital admission/ or \*hospital discharge/ or \*hospital readmission/ or exp \*hospital patient/ or \*outpatient/ (45807)
- 8 (discharge\* or (length\* adj2 stay\*) or (duration\* adj2 stay\*) or admission\* or readmission\* or inpatient\* or outpatient\*).tw. (606089)
- 9 7 or 8 (619909)
- 10 6 and 9 (1326)

**Strategy - Early discharge and children:**

- 1 (early adj2 discharge\*).ti,ab. (3877)
- 2 \*"length of stay"/ and \*hospital discharge/ (302)
- 3 or/1-2 (4096)
- 4 (baby\* or babies or infan\* or kid or kids or toddler\* or adoles\* or teen\* or boy\* or girl\* or junevil\* or youth\* or puber\* or prepuber\* or pubescen\* or prepubescen\* or pediatric\* or paediatric\* or young person\* or young people or young adult\* or child\* or schoolchild\* or schoolage\* or school\* or preschool\*).tw. (2080868)
- 5 \*adolescent/ or exp \*child/ or \*infant/ or \*young adult/ (201877)
- 6 or/4-5 (2144190)
- 7 3 and 6 (778)

**Medline:****Febrile neutropenia and length of stay:**

**Ovid MEDLINE(R) In-Process & Other Non-Indexed Citations and Ovid MEDLINE(R) <1946 to Present>** was searched on 21/05/2014, using the OVID SP interface.

882 records were retrieved

**Early discharge and children:**

**Ovid MEDLINE(R) In-Process & Other Non-Indexed Citations and Ovid MEDLINE(R) <1946 to Present>** was searched on 01/07/2014, using the OVID SP interface.

1850 records were retrieved

**Key:**

/=index term (MeSH heading)

\*=truncation

?= embedded truncation

ti=title field

ab=abstract

tw= textword

.ti,ab=terms were searched for in either title or abstract

adj = terms adjacent to each other (same order)

adj1 = terms within one word of each other (any order)

adj2 = terms within two words of each other (any order)

**Strategy - Febrile neutropenia and length of stay:**

- 1 Agranulocytosis/ or neutropenia/ or leukopenia/ (26987)
- 2 exp Fever/ or exp "Fever of Unknown Origin"/ or exp Body Temperature/ (103894)
- 3 (1 and 2) or febrile neutropenia/ (2887)
- 4 (febrile adj5 (neutropen\* or granulocytop\* or agranulocyto\* or leukocytop??ni\*)).ti,ab. (5283)
- 5 ((fever or temperature or temp) adj5 (neutropen\* or granulocytop\* or agranulocyto\* or leukocytop??ni\*)).ti,ab. (2742)
- 6 3 or 4 or 5 (8323)
- 7 exp "length of stay"/ or exp patient admission/ or exp patient discharge/ or exp patient readmission/ or exp inpatients/ or exp outpatients/ (110907)
- 8 (discharge\* or (length\* adj2 stay\*) or (duration\* adj2 stay\*) or admission\* or readmission\* or inpatient\* or outpatient\*).tw. (433243)
- 9 7 or 8 (480710)
- 10 6 and 9 (882)

**Strategy - Early discharge and children:**

- 1 (early adj2 discharge\*).ti,ab. (2808)
- 2 "length of stay"/ and patient discharge/ (3610)
- 3 patient discharge/ and Time Factors/ (2067)
- 4 or/1-3 (7230)
- 5 adolescent/ or exp child/ or infant/ or exp young adult/ (2748218)
- 6 (baby\* or babies or infan\* or kid or kids or toddler\* or adoles\* or teen\* or boy\* or girl\* or junevil\* or youth\* or puber\* or prepuber\* or pubescen\* or prepubescen\* or pediatric\* or

paediatric\* or young person\* or young people or young adult\* or child\* or schoolchild\* or  
schoolage\* or school\* or preschool\*).tw. (1703554)

7 5 or 6 (3323001)

8 4 and 7 (2008)

9 8 (2008)

10 limit 9 to english language (1850)

11 10 (1850)

12 limit 11 to yr="1950 -Current" (1850)

**PsycINFO (Ovid Online – <http://www.ovid.com/>)** 1806 to July Week 1 2014 was searched on  
04/07/2014

Retrieved 501 hits

**Key:**

/ = indexing term

\$ = truncation

? = embedded truncation

md = methodology field

.ti,ab. = terms in either title or abstract fields

adj = terms adjacent to each other (same order)

adj1 = terms within one word of each other (any order)

adj2 = terms within two words of each other (any order)

**Search Strategy – (Early discharge AND child) OR febrile neutropenia:**

1 (early adj2 discharge\*).ti,ab. (237)

2 Hospital Discharge/ (1547)

3 1 or 2 (1734)

4 (baby\* or babies or infan\* or kid or kids or toddler\* or adoles\* or teen\* or boy\* or girl\* or  
junevil\* or youth\* or puber\* or prepuber\* or pubescen\* or prepubescen\* or pediatric\* or  
paediatric\* or young person\* or young people or young adult\* or child\* or schoolchild\* or  
schoolage\* or school\* or preschool\*).tw. (922624)

5 3 and 4 (225)

6 limit 3 to (100 childhood <birth to age 12 yrs> or 140 infancy <2 to 23 mo> or 160 preschool age  
<age 2 to 5 yrs> or 180 school age <age 6 to 12 yrs> or 200 adolescence <age 13 to 17 yrs> or 320  
young adulthood <age 18 to 29 yrs>) (409)

7 5 or 6 (473)

8 (febrile adj5 (neutropen\* or granulocyt\* or agranulocyto\* or leukocyt\*??ni\*)).ti,ab. (13)

9 ((fever or temperature or temp) adj5 (neutropen\* or granulocyt\* or agranulocyto\* or  
leukocyt\*??ni\*)).ti,ab. (9)

10 "febrile neutropenia".id. (6)

11 exp "Blood and Lymphatic Disorders"/ (3658)

12 hyperthermia/ (813)

13 11 and 12 (21)

14 8 or 9 or 10 or 13 (39)

15 7 or 14 (512)

16 limit 15 to english language (501)
