# Supplementary material for: Meta-ethnography of experiences of early discharge, with a focus on paediatric febrile neutropenia
Source: Springer Nature journal article supplement (doi:10.1007/s00520-017-3983-2), 2017-12-28
Supplement: MOESM2 [file 15333886]

## Supplemental File 2: Quality assessment

Meta-ethnography of experiences of early discharge, with a focus on paediatric febrile neutropenia

Supportive Care in Cancer

Jessica E Morgan\*, Jemma Cleminson, Lesley A Stewart, Robert S Phillips, and Karl Atkin

\*Corresponding Author: Jessica E Morgan, Centre for Reviews and Dissemination, University of York, Heslington, York, YO10 5DD, UK, Email: jess.morgan@york.ac.uk,

| Study                                  | Does the report clearly state the philosophical and theoretical premises on which the study is based? | Does the report clearly state the methodological approach adopted on which the study is based? | Is there congruence between the two? | Is the study methodology appropriate for addressing the research question? | Are the data collection methods appropriate to the methodology? | Are the data analysed and represented in ways that are congruent with the stated methodological position? | Are the results interpreted in ways that are appropriate to the methodology? | Are the researchers' beliefs and values, and their potential influence on the study declared? | Is the potential for the researcher to influence the study and for the potential of the research process itself to influence the researcher and her/his interpretations acknowledged and addressed? | Are participants, and their voices, adequately represented? | Has the study been ethically approved by an appropriate body? | Do the conclusions drawn in the research report appear to flow from the analysis, or interpretation, of the data? |
|----------------------------------------|-------------------------------------------------------------------------------------------------------|------------------------------------------------------------------------------------------------|--------------------------------------|----------------------------------------------------------------------------|-----------------------------------------------------------------|-----------------------------------------------------------------------------------------------------------|------------------------------------------------------------------------------|-----------------------------------------------------------------------------------------------|-----------------------------------------------------------------------------------------------------------------------------------------------------------------------------------------------------|-------------------------------------------------------------|---------------------------------------------------------------|-------------------------------------------------------------------------------------------------------------------|
| Diorio et al, 2011 <sup>1</sup>        | No                                                                                                    | Yes                                                                                            | ?                                    | Yes                                                                        | Yes                                                             | Yes                                                                                                       | Yes                                                                          | No                                                                                            | No                                                                                                                                                                                                  | Yes                                                         | Yes                                                           | Yes                                                                                                               |
| Freund and Siegel, 1986 <sup>2</sup>   | No                                                                                                    | ?                                                                                              | ?                                    | Yes                                                                        | ?                                                               | Yes                                                                                                       | Yes                                                                          | No                                                                                            | No                                                                                                                                                                                                  | ?                                                           | No                                                            | ?                                                                                                                 |
| Fuji et al, 2013 <sup>3</sup>          | No                                                                                                    | ?                                                                                              | ?                                    | ?                                                                          | Yes                                                             | Yes                                                                                                       | Yes                                                                          | No                                                                                            | No                                                                                                                                                                                                  | Yes                                                         | Yes                                                           | Yes                                                                                                               |
| Hally et al, 1977 <sup>4</sup>         | No                                                                                                    | No                                                                                             | ?                                    | ?                                                                          | ?                                                               | ?                                                                                                         | ?                                                                            | No                                                                                            | No                                                                                                                                                                                                  | ?                                                           | ?                                                             | Yes                                                                                                               |
| Sartain et al, 2000 <sup>5</sup>       | Yes                                                                                                   | Yes                                                                                            | Yes                                  | Yes                                                                        | Yes                                                             | Yes                                                                                                       | Yes                                                                          | No                                                                                            | No                                                                                                                                                                                                  | Yes                                                         | Yes                                                           | Yes                                                                                                               |
| Sartain et al, 2001 <sup>6</sup>       | No                                                                                                    | No                                                                                             | ?                                    | ?                                                                          | Yes                                                             | Yes                                                                                                       | Yes                                                                          | No                                                                                            | No                                                                                                                                                                                                  | Yes                                                         | ?                                                             | Yes                                                                                                               |
| Smith and Daughtrey, 2000 <sup>7</sup> | No                                                                                                    | ?                                                                                              | ?                                    | ?                                                                          | Yes                                                             | Yes                                                                                                       | Yes                                                                          | No                                                                                            | No                                                                                                                                                                                                  | Yes                                                         | Yes                                                           | Yes                                                                                                               |

|                                 |    |    |   |     |   |   |     |    |    |     |   |     |
|---------------------------------|----|----|---|-----|---|---|-----|----|----|-----|---|-----|
| Tatman et al, 1992 <sup>8</sup> | No | No | ? | ?   | ? | ? | ?   | No | No | Yes | ? | Yes |
| While, 1992 <sup>9</sup>        | ?  | No | ? | Yes | ? | ? | Yes | No | ?  | Yes | ? | Yes |

? = Unclear

### References:

1. Diorio C, Martino J, Boydell KM, et al. Parental perspectives on inpatient versus outpatient management of pediatric febrile neutropenia. *J Pediatr Oncol Nurs*. 2011;28(6):355-362. doi:10.1177/1043454211418665.
2. Freund BL, Siegel K. Problems in transition following bone marrow transplantation: Psychosocial aspects. *Am J Orthopsychiatry*. 1986;56(2):244-252. doi:10.1111/j.1939-0025.1986.tb02724.x.
3. Fuji KT, Abbott AA, Norris JF. Exploring Care Transitions From Patient, Caregiver, and Health-Care Provider Perspectives. *Clin Nurs Res*. 2013;22(3):258-274.
4. Hally MR, Holohan A, Jackson RH, Reedy BL, Walker JH. Paediatric home nursing scheme in Gateshead. *Br Med J*. 1977;1(6063):762-764.
5. Sartain SA, Clarke CL, Heyman R. Hearing the voices of children with chronic illness. *J Adv Nurs*. 2000;32(4):913-921.
6. Sartain SA, Maxwell MJ, Todd PJ, Haycox AR, Bundred PE. Users' views on hospital and home care for acute illness in childhood. *Health Soc Care Community*. 2001;9(2):108-117.
7. Smith L, Daughtrey H. Weaving the seamless web of care: an analysis of parents' perceptions of their needs following discharge of their child from hospital. *J Adv Nurs*. 2000;31(4):812-820. doi:10.1046/j.1365-2648.2000.01339.x.
8. Tatman MA, Woodroffe C, Kelly PJ, Harris RJ. Paediatric home care in Tower Hamlets: a working partnership with parents. *Qual Health Care*. 1992;1(2):98-103.
9. While AE. Consumer views of health care: a comparison of hospital and home care. *Child Care Health Dev*. 1992;18(2):107-116. doi:10.1111/j.1365-2214.1992.tb00345.x.
