# Supplementary material for: Meta-ethnography of experiences of early discharge, with a focus on paediatric febrile neutropenia
Source: Springer Nature journal article supplement (doi:10.1007/s00520-017-3983-2), 2017-12-28
Supplement: MOESM3 [file 15333886]

### Supplemental File 3: Reasons for study exclusion

Meta-ethnography of experiences of early discharge, with a focus on paediatric febrile neutropenia

Supportive Care in Cancer

Jessica E Morgan\*, Jemma Cleminson, Lesley A Stewart, Robert S Phillips, and Karl Atkin

\*Corresponding Author: Jessica E Morgan, Centre for Reviews and Dissemination, University of York, Heslington, York, YO10 5DD, UK, Email: jess.morgan@york.ac.uk,

| Study                                     | Reason for exclusion          |
|-------------------------------------------|-------------------------------|
| Beguin et al, 2002 <sup>1</sup>           | Not primary research          |
| Belanger, 2001 <sup>2</sup>               | Not patient group of interest |
| Burke, 1999 <sup>3</sup>                  | Review article                |
| Carpenter, 1998 <sup>4</sup>              | Neonatal                      |
| Charles and Prystowsky, 1995 <sup>5</sup> | Neonatal                      |
| Finkelstein, 1980 <sup>6</sup>            | Not patient group of interest |
| Flowers and Karten, 2013 <sup>7</sup>     | Commentary                    |
| Forsander, 1995 <sup>8</sup>              | Quantitative                  |
| Freifeld and Sepkowitz, 2011 <sup>9</sup> | Commentary                    |
| Gatford, 2004 <sup>10</sup>               | Not early discharge           |
| Graumlich et al, 2008 <sup>11</sup>       | Quantitative                  |
| Gunnell et al, 2000 <sup>12</sup>         | Not patient group of interest |
| Jester and Hicks, 2003a <sup>13</sup>     | Not patient group of interest |
| Jester and Hicks, 2003b <sup>14</sup>     | Not patient group of interest |
| Jones, 2007 <sup>15</sup>                 | Not patient group of interest |
| Karthaus et al, 2000 <sup>16</sup>        | Quantitative                  |
| Kibbler and Prentice, 1997 <sup>17</sup>  | Review article                |
| King, 1996 <sup>18</sup>                  | Review article                |
| Krupski and Domm, 2014 <sup>19</sup>      | Commentary                    |
| Lingarajam et al, 2010 <sup>20</sup>      | Quantitative                  |
| Luker et al, 2003 <sup>21</sup>           | Not patient group of interest |
| Margolan et al, 2004 <sup>22</sup>        | Not early discharge           |
| Menahem et al, 1997 <sup>23</sup>         | Not early discharge           |
| Mendler et al, 1996 <sup>24</sup>         | Neonatal                      |
| Meropol et al, 1994 <sup>25</sup>         | Quantitative                  |
| Mikkelsen et al, 2008 <sup>26</sup>       | Not early discharge           |
| Moxley, 1977 <sup>27</sup>                | Not patient group of interest |
| Mullen, 1998 <sup>28</sup>                | Quantitative                  |
| Mullen, 2001 <sup>29</sup>                | Review article                |
| Orme et al, 2010 <sup>30</sup>            | Quantitative                  |
| Ouvrier et al, 2006 <sup>31</sup>         | Correspondence                |
| Patrick and Shenep, 1999 <sup>32</sup>    | Review article                |
| Paulson, 1987 <sup>33</sup>               | Review article                |

|                                            |                       |
|--------------------------------------------|-----------------------|
| Pinto et al, 2010 <sup>34</sup>            | Qualitative synthesis |
| Richards et al, 1998 <sup>35</sup>         | Quantitative          |
| Rolston et al, 1996 <sup>36</sup>          | Review article        |
| Rubenstein and Rolston, 1995 <sup>37</sup> | Review article        |
| Silva and High, 1998 <sup>38</sup>         | Review article        |
| Slavin and Thursky, 2013 <sup>39</sup>     | Review article        |
| Svahn et al, 2004 <sup>40</sup>            | Quantitative          |
| Tice, 1998 <sup>41</sup>                   | Review article        |
| Turley and Higgins, 1996 <sup>42</sup>     | Quantitative          |
| Uzark et al, 1994 <sup>43</sup>            | Quantitative          |
| Uzun and Anaissie, 1999 <sup>44</sup>      | Review article        |
| Youngblut et al, 1994 <sup>45</sup>        | Quantitative          |

### References:

1. Beguin Y, Benoit Y, Crokaert F, Selleslag D, Vandercam B. Outpatient and home parenteral antibiotic therapy (OHPAT) in low-risk febrile neutropenia: Consensus statement of a Belgian panel. *Acta Clin Belg.* 2002;57(6):309-316.
2. Bélanger G. Coordinating from hospital to home - special challenges for the pediatric patient requiring IV antibiotics. Canadian Intravenous Nurses Association 26th Annual Conference, November 14-16, 2001. *CINA Off J Can Intraven Nurses Assoc.* 2001;17:14-14.
3. Burke BL. Moving children with cancer from hospital to home. *Can Nurse.* 1999;95(2):25-28.
4. Carpenter JA. Shortening the short stay. *AWHONN Lifelines.* 1998;2(1):28-34.
5. Charles S, Prystowsky B. Early discharge, in the end: maternal abuse, child neglect, and physician harassment. *Pediatrics.* 1995;96(4 Pt 1):746-747.
6. Finkelstein NE. Family-centered group care. *Child Welfare.* 1980;59(1):33-41.
7. Flowers CR, Karten C. Communicating safe outpatient management of fever and neutropenia. *J Oncol Pract Soc Clin Oncol.* 2013;9(4):207-210. doi:10.1200/JOP.2012.000815.
8. Forsander G. Family attitudes to different management regimens in diabetes mellitus. *Pract Diabetes Int.* 1995;12(2):80-85.
9. Freifeld AG, Sepkowitz KA. No place like home? Outpatient management of patients with febrile neutropenia and low risk. *J Clin Oncol.* 2011;29(30):3952-3954. doi:10.1200/JCO.2011.37.5758.
10. Gatford A. Time to go home: Putting together a package of care. *Child Care Health Dev.* 2004;30(3):243-246. doi:10.1111/j.1365-2214.2004.00413.x.
11. Graumlich JF, Novotny NL, Aldag JC. Brief scale measuring patient preparedness for hospital discharge to home: Psychometric properties. *J Hosp Med.* 2008;3(6):446-454. doi:10.1002/jhm.316.

12. Gunnell D, Coast J, Richards S. How great a burden does early discharge to hospital at home impose on carers? A randomized controlled trial. *Age Ageing*. 2000;29(2):137-142.
13. Jester R, Hicks C. Using cost-effectiveness analysis to compare Hospital at Home and in-patient interventions, part 1. *J Clin Nurs*. 2003;12(1):13-19.
14. Jester R, Hicks C. Using cost-effectiveness analysis to compare Hospital at Home and in-patient interventions, part 2. *J Clin Nurs*. 2003;12(1):20-27.
15. Jones SG. Negotiating time: The significance of timing in ending inpatient work. *J Child Psychother*. 2007;33(3):325-344. doi:10.1080/00754170701667205.
16. Karthaus M, Egerer G, Jurgens H. Outpatient treatment of cancer patients with fever and neutropenia. *Antibiot Chemother*. 2000;50:47-58.
17. Kibbler CC, Prentice HG. Which febrile neutropenic patients are suitable for outpatient management? *Curr Opin Infect Dis*. 1997;10(4):251-254.
18. King M. Paediatric home outreach. *Vis* 11749784. 1996;2(2):8-9.
19. Krupski C, Domm J. Is it time to consider early discharge for pediatric patients after hematopoietic stem cell transplant? *Pediatr Transplant*. 2014;18(4):325-326. doi:10.1111/petr.12250.
20. Lingaratnam S, Kirsa S, Slavin M, Worth L, Thursky K. Organisational readiness assessment across Western and Central Melbourne Integrated Cancer Services (WCMICS) hospitals in preparation for implementation of an ambulatory care program for management of low risk patients with febrile neutropenia. *Asia Pac J Clin Oncol*. 2010;6:196. doi:10.1111/j.1743-7563.2010.01349.x.
21. Luker K, Wilson K, Pateman B, Beaver K. The role of district nursing: Perspectives of cancer patients and their carers before and after hospital discharge. *Eur J Cancer Care (Engl)*. 2003;12(4):308-316. doi:10.1046/j.1365-2354.2003.00415.x.
22. Margolan H, Fraser J, Lenton S. Parental experience of services when their child requires long-term ventilation. Implications for commissioning and providing services. *Child Care Health Dev*. 2004;30(3):257-264.
23. Menahem S, Roth D, Haramati S. Psychiatric collaboration in a paediatric department. *Aust N Z J Psychiatry*. 1997;31(2):214-218.
24. Mendler VM, Scallen DJ, Kovtun LA, Balesky J, Lewis C. The conception, birth, and infancy of an early discharge program. *MCN Am J Matern Child Nurs*. 1996;21(5):241-246.
25. Meropol NJ, Fox KR, Vaughn DJ, Zeiber N. A pilot study of early hospital discharge in adult patients with fever and neutropenia. *Eur J Cancer*. 1994;30A(10):1595-1596.
26. Mikkelsen TH, Sondergaard J, Jensen AB, Olesen F. Cancer rehabilitation: Psychosocial rehabilitation needs after discharge from hospital? A qualitative interview study. *Scand J Prim Health Care*. 2008;26(4):216-221. doi:10.1080/02813430802295610.
27. Moxley VM. The pre- and post-hospital experiences of rural Midwest adolescent mental patients. *Diss Abstr Int*. 1977;38(6-B):2613.

28. Mullen C. Outpatient management of fever and neutropenia in children with cancer. *Int J Pediatr Hematol*. 1998;5(1):63.
29. Mullen CA. Which children with fever and neutropenia can be safely treated as outpatients? *Br J Haematol*. 2001;112(4):832-837. doi:10.1046/j.1365-2141.2001.02632.x.
30. Orme L, Babl F, Barnes C, Barnett P, Donath S, Ashley D. Quality of life: A randomized trial of outpatient versus inpatient iv antibiotics for paediatric oncology patients with low risk febrile neutropaenia. *Pediatr Blood Cancer*. 2010;55 (5):823-824. doi:10.1002/pbc.22779.
31. Ouvrier MJ, Thery JC, Blot E. Outpatient oral antibiotics for febrile neutropenic cancer patients. *J Clin Oncol*. 2006;24(35):5614; author reply 5614-5615.
32. Patrick CC, Shenep JL. Outpatient management of the febrile neutropenic child with cancer. *Adv Pediatr Infect Dis*. 1999;14:29-47.
33. Paulson PR. Nursing considerations for discharging children home on low-flow oxygen. *Issues Compr Pediatr Nurs*. 1987;10(4):209-214. doi:10.3109/01460868709094377.
34. Pinto JP, Ribeiro CA, Pettengill MAM. The recovery process of children after discharge from hospital: an integrative review. *Acta Paul Enferm*. 2010;23(6):837-842. doi:10.1590/s0103-21002010000600019.
35. Richards S, Coast J, Gunnell D. Randomised controlled trial comparing effectiveness and acceptability of an early discharge, hospital at home scheme with acute hospital care. *BMJ Clin Res Ed*. 1998;316(7147):1796-1801.
36. Rolston KVI, Rubenstein EB, Freifeld A. Early empiric antibiotic therapy for febrile neutropenia patients at low risk. *Infect Dis Clin North Am*. 1996;10(2):223-237. doi:10.1016/S0891-5520%2805%2970297-X.
37. Rubenstein EB, Rolston KV. Outpatient treatment of febrile neutropenic patients with cancer. *Eur J Cancer*. 1995;31A(1):2-4.
38. Silva IC, High KP. Outpatient treatment for febrile neutropenic patients. *Infect Dis Clin Pract*. 1998;7(7):307-311.
39. Slavin MA, Thursky KA. Outpatient therapy for fever and neutropenia is safe but implementation is the key. *J Clin Oncol*. 2013;31(9):1128-1129. doi:10.1200/JCO.2012.47.5905.
40. Svahn BM, Bjurman B, Myrback KE, Aschan J, Ringden O. Is it safe to treat allogeneic stem cell transplanted recipients at home during the pancytopenic phase? A pilot trial. *Presse Med*. 2004;33(7):474-478.
41. Tice AD. Outpatient parenteral antibiotic therapy for fever and neutropenia. *Infect Dis Clin North Am*. 1998;12(4):963-977, viii.
42. Turley KM, Higgins SS. When parents participate in critical pathway management following pediatric cardiovascular surgery. *MCN Am J Matern Child Nurs*. 1996;21(5):229-234.
43. Uzark K, LeRoy S, Callow L, Cameron J, Rosenthal A. The pediatric nurse practitioner as case manager in the delivery of services to children with heart disease. *J Pediatr Health Care*. 1994;8(2):74-78.

44. Uzun O, Anaissie EJ. Outpatient therapy for febrile neutropenia: who, when, and how? *J Antimicrob Chemother.* 1999;43(3):317-320.
45. Youngblut JM, Brennan PF, Swegart LA. Families with medically fragile children: an exploratory study. *Pediatr Nurs.* 1994;20(5):463-468.
