# Supplementary material for: Meta-ethnography of experiences of early discharge, with a focus on paediatric febrile neutropenia
Source: Springer Nature journal article supplement (doi:10.1007/s00520-017-3983-2), 2017-12-28
Supplement: MOESM4 [file 15333886]

## Supplemental File 4: Results of CLUSTER searches

Meta-ethnography of experiences of early discharge, with a focus on paediatric febrile neutropenia

Supportive Care in Cancer

Jessica E Morgan\*, Jemma Cleminson, Lesley A Stewart, Robert S Phillips, and Karl Atkin

\*Corresponding Author: Jessica E Morgan, Centre for Reviews and Dissemination, University of York, Heslington, York, YO10 5DD, UK, Email: jess.morgan@york.ac.uk,

| Step 1 - Pearl citation        | Step 2 - Check reference list of pearl citation for citations by authors | Step 3 - Recheck 'database of search results' EndNote library – search using authors from pearl citation | Step 4 - Search for author publication lists (number of authors searched) | Step 5 - Citation searches on Web of Science and Google Scholar for pearl citation | Step 6 - Searches on project name/identifier | Step 7 - Make contact with lead author | Number of studies included in synthesis |
|--------------------------------|--------------------------------------------------------------------------|----------------------------------------------------------------------------------------------------------|---------------------------------------------------------------------------|------------------------------------------------------------------------------------|----------------------------------------------|----------------------------------------|-----------------------------------------|
| Sartain et al <sup>1</sup>     | 0                                                                        | 0                                                                                                        | 25 (2)                                                                    | 15, 30                                                                             | 26                                           | 0                                      | 1                                       |
| Freund and Siegel <sup>2</sup> | 0                                                                        | 0                                                                                                        | 118 (2)                                                                   | 30, 49                                                                             | n/a                                          | 0                                      | 0                                       |
| Diorio et al <sup>3</sup>      | 1                                                                        | 40                                                                                                       | 200 (2)                                                                   | 4                                                                                  | n/a                                          | 0                                      | 0                                       |

### References:

1. Sartain SA, Maxwell MJ, Todd PJ, Haycox AR, Bundred PE. Users' views on hospital and home care for acute illness in childhood. *Health Soc Care Community*. 2001;9(2):108-117.
2. Freund BL, Siegel K. Problems in transition following bone marrow transplantation: Psychosocial aspects. *Am J Orthopsychiatry*. 1986;56(2):244-252. doi:10.1111/j.1939-0025.1986.tb02724.x.
3. Diorio C, Martino J, Boydell KM, et al. Parental perspectives on inpatient versus outpatient management of pediatric febrile neutropenia. *J Pediatr Oncol Nurs*. 2011;28(6):355-362. doi:10.1177/1043454211418665.
